# Supplementary material
Source: PubMed Central journal article supplement (PMC11551520)
Supplement: NIHMS2017446-supplement-Supp_Material.pdf [file NIHMS2017446-supplement-Supp_Material.pdf]

## Supplementary Online Content

Chew EY, Clemons TE, Agrón E, et al. Ten-year follow-up of age-related macular degeneration in the Age-Related Eye Disease Study. *JAMA Ophthalmol*. Published online January 2, 2014.  
doi:10.1001/jamaophthalmol.2013.6636.

**eFigure 1.** Ten-year rates of development of central GA and neovascular AMD by baseline AMD status.

**eFigure 2.** Life-table estimates of large drusen and advanced AMD in participants with no large drusen or advanced AMD at baseline.

**eFigure 3.** Life-table estimates of advanced AMD in eyes that developed large drusen and retinal pigment epithelial abnormalities during the study.

**eFigure 4.** Life-table estimates of advanced AMD in participants with bilateral large drusen at baseline.

**eFigure 5.** Life-table estimates of advanced AMD in right eyes with large drusen at baseline according to location of large drusen and presence of retinal pigment epithelial abnormalities.

**eFigure 6.** Life-table estimates of advanced AMD in eyes with fellow eyes with and without advanced AMD.

**eFigure 7.** Life-table estimates of neovascular AMD in eyes that developed geographic atrophy, N = 911.

**eFigure 8.** Probability of advanced AMD by AREDS simple scale, N = 3806.

**eFigure 9.** Median visual acuity.

**eTable.** Drusen size for eyes with central geographic atrophy (CGA) and neovascular age-related macular degeneration (NV AMD).

This supplementary material has been provided by the authors to give readers additional information about their work.

Figure 1. Ten-year rates of development of central GA and neovascular AMD by baseline AMD status.

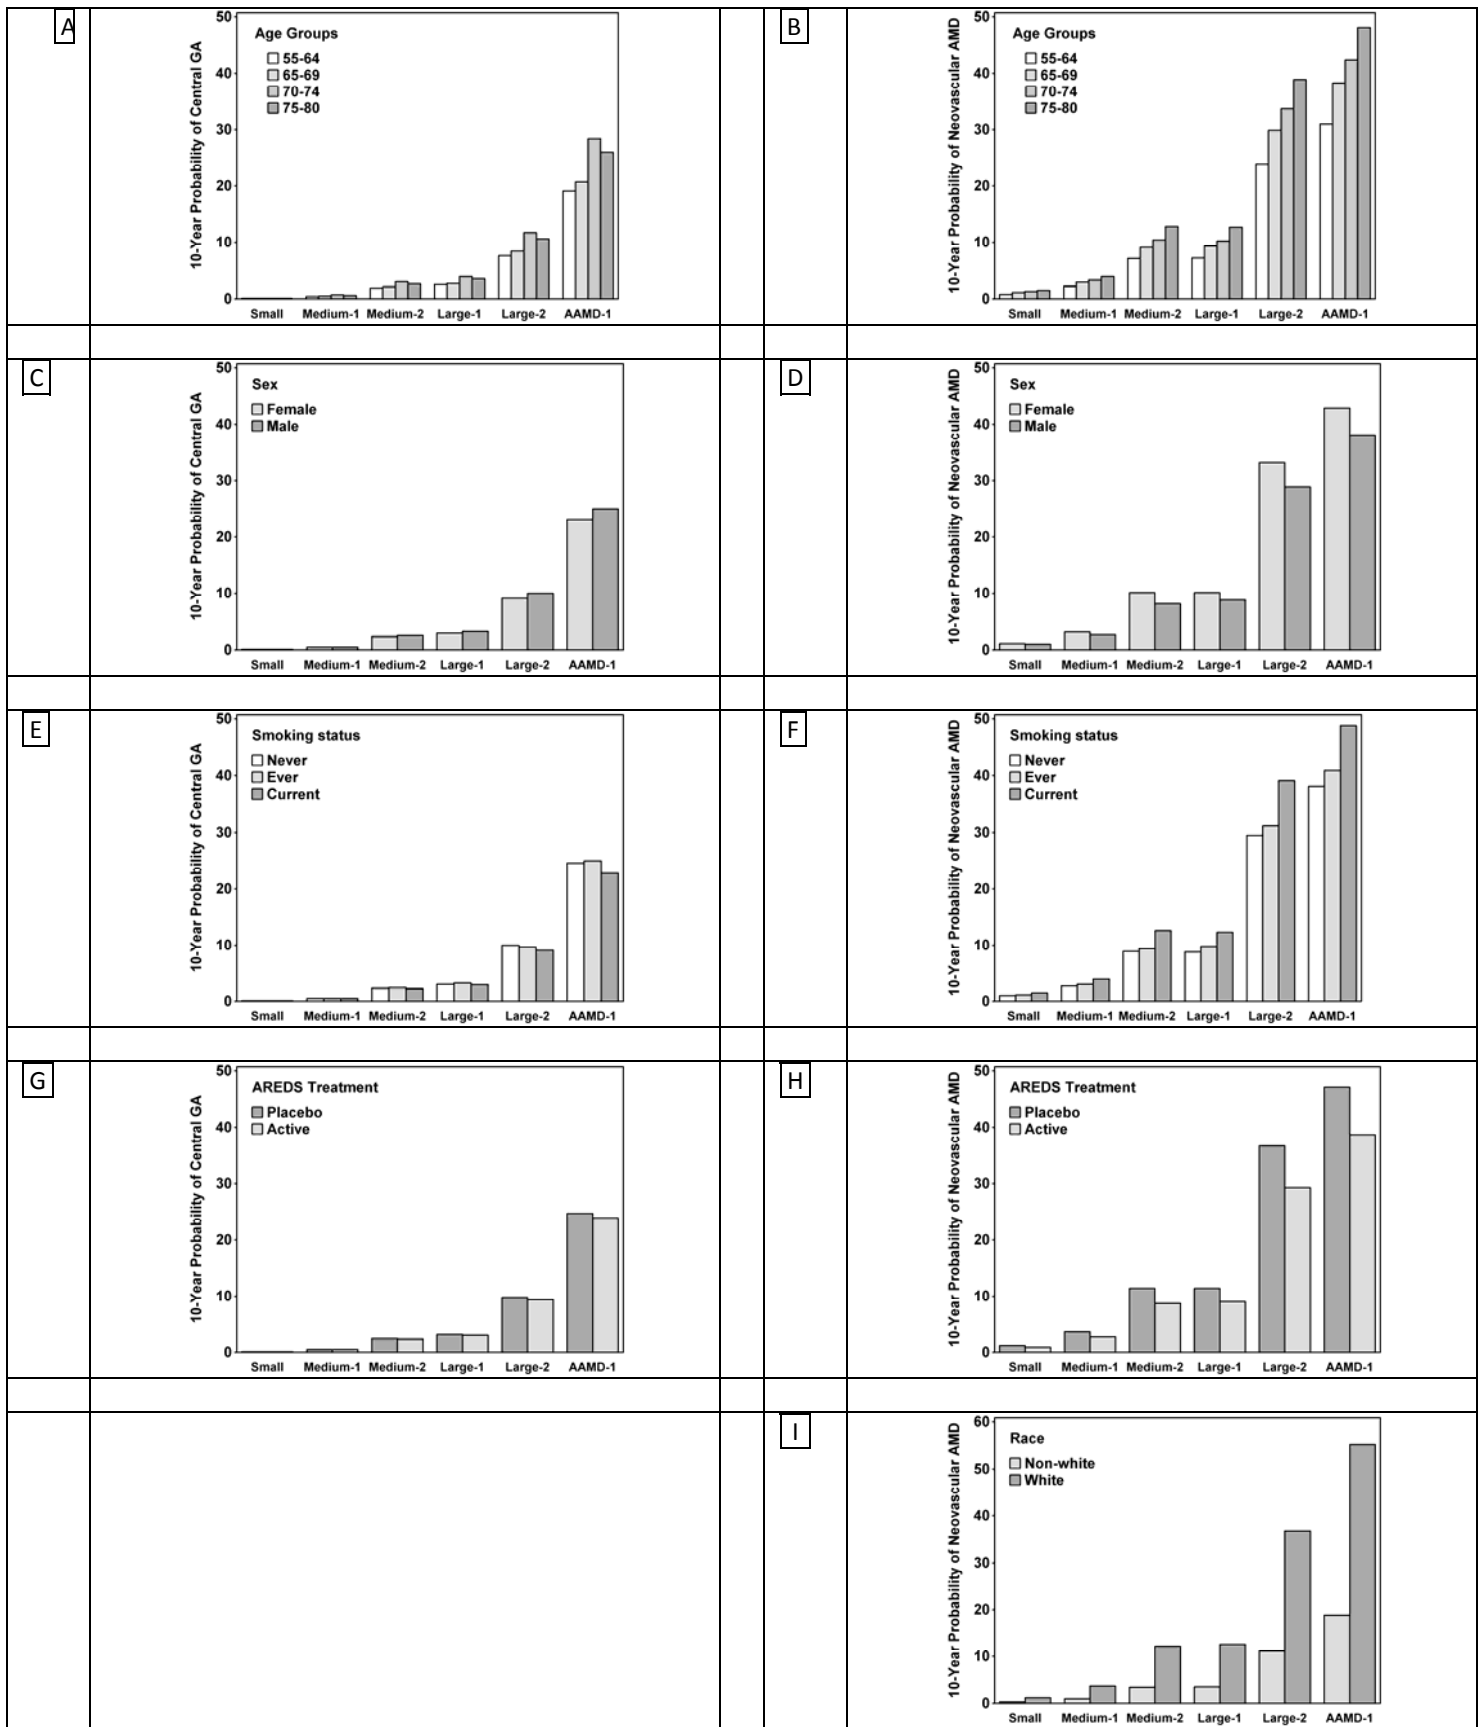

Figure 2. Life-table estimates of large drusen and advanced AMD in participants with no large drusen or advanced AMD at baseline.

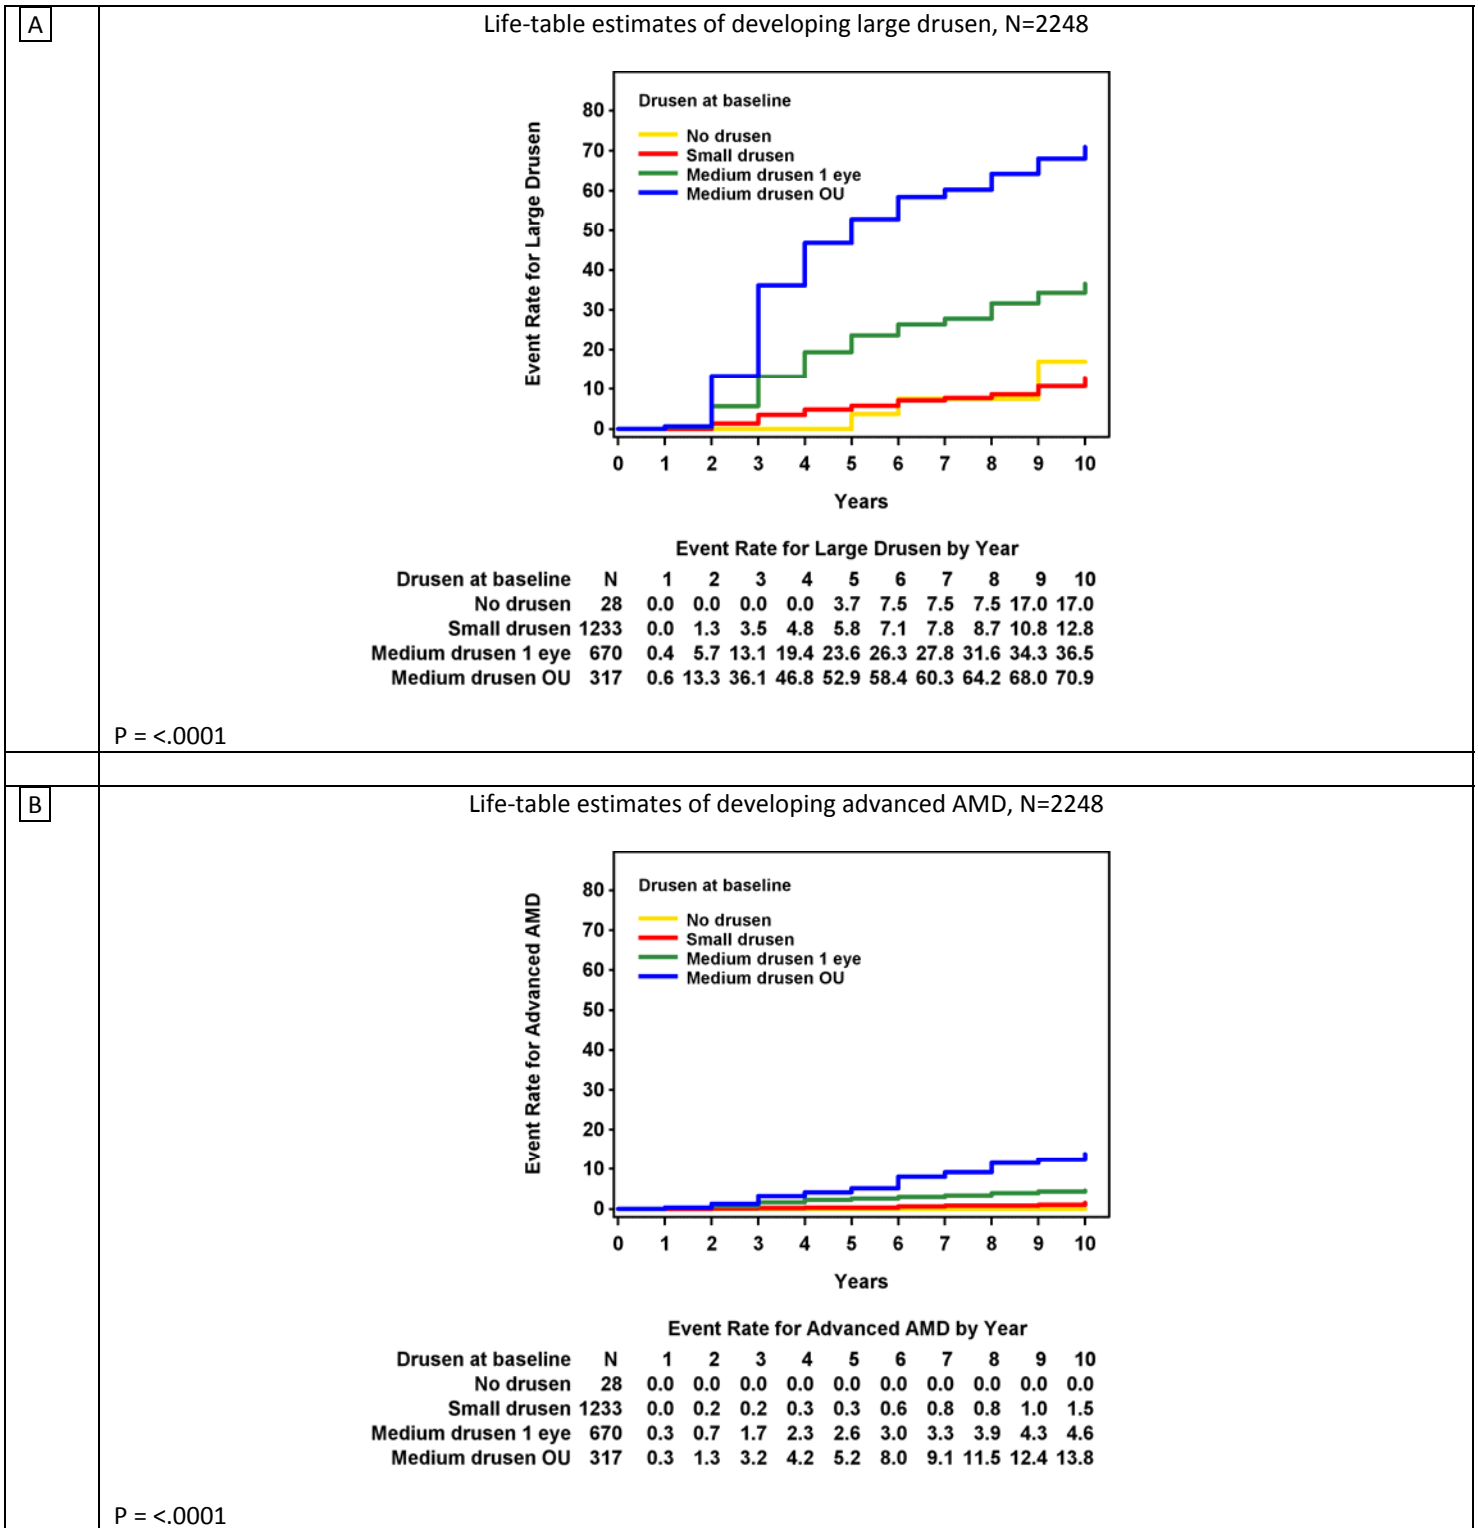

Figure 3. Life-table estimates of advanced AMD in eyes that developed large drusen and retinal pigment epithelial abnormalities during the study.

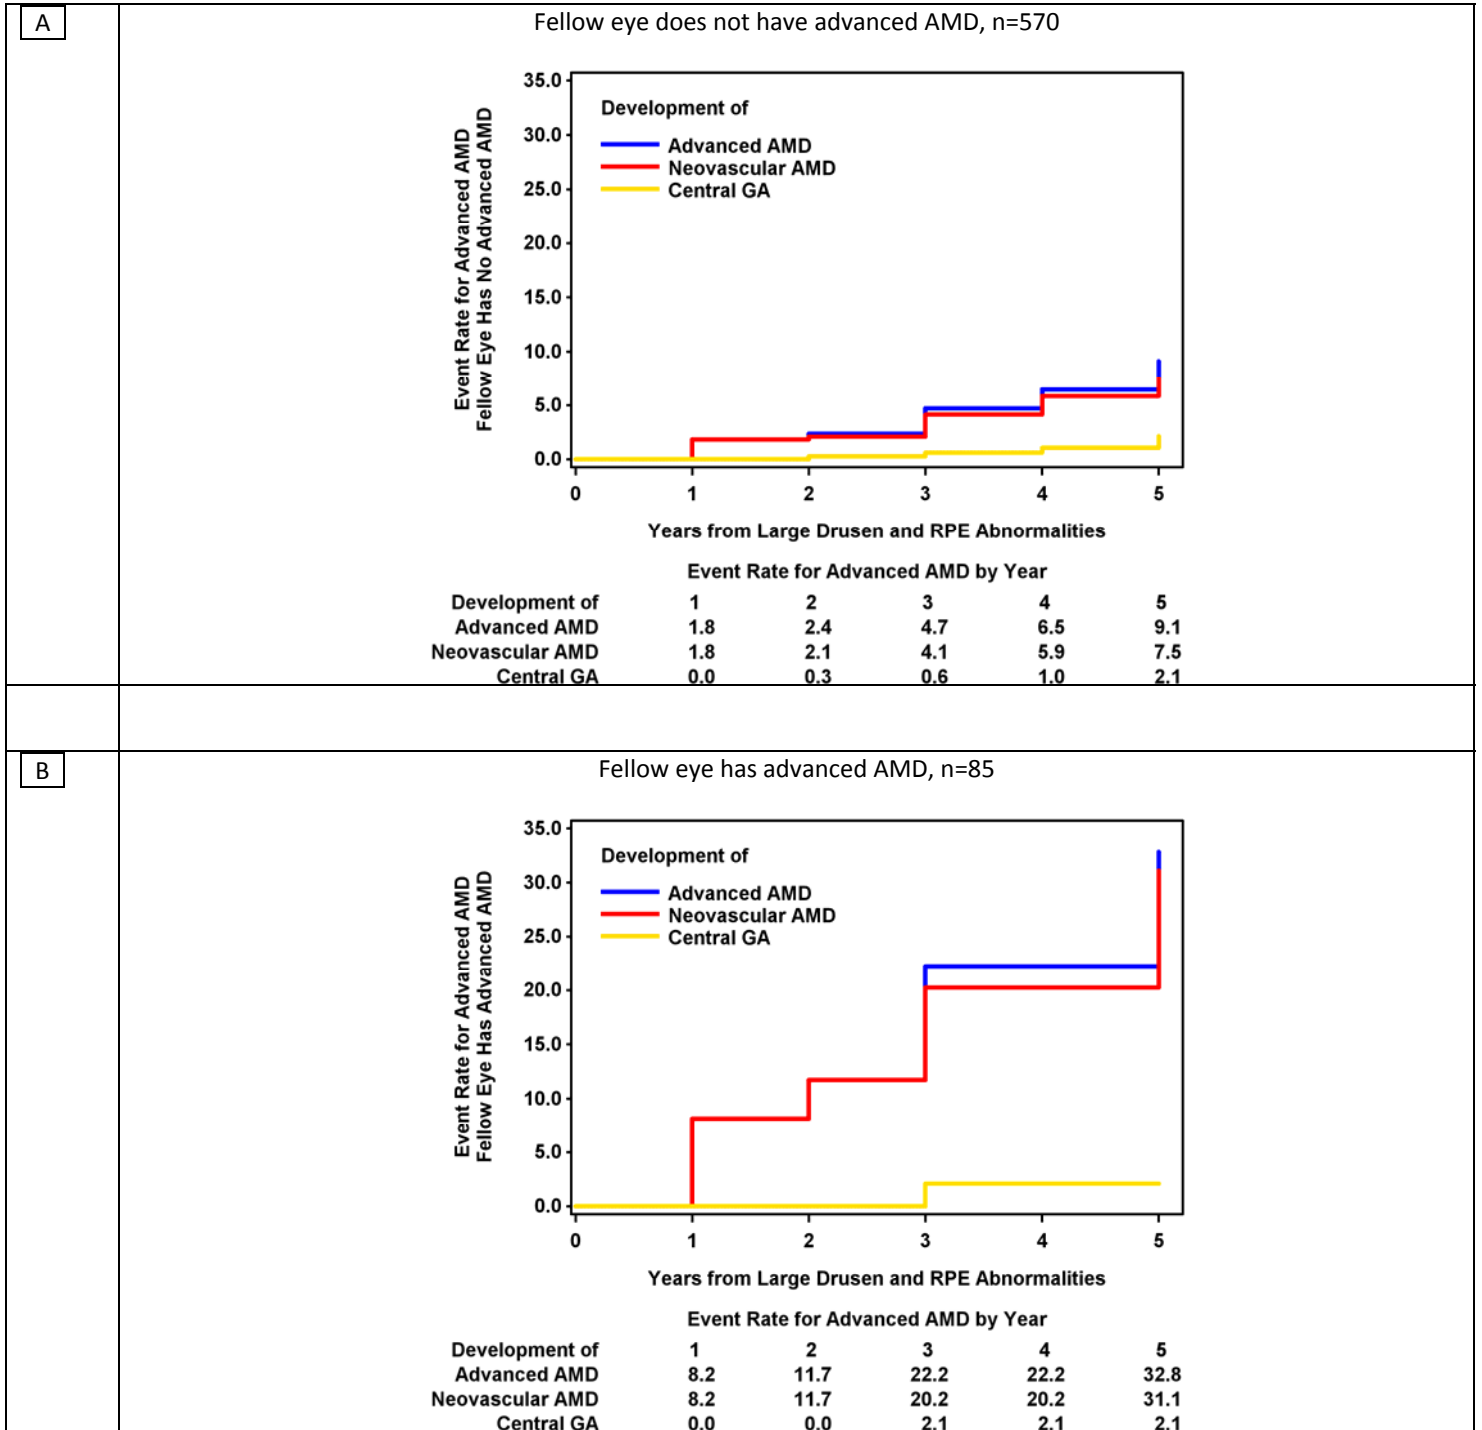

Figure 4. Life-table estimates of advanced AMD in participants with bilateral large drusen at baseline.

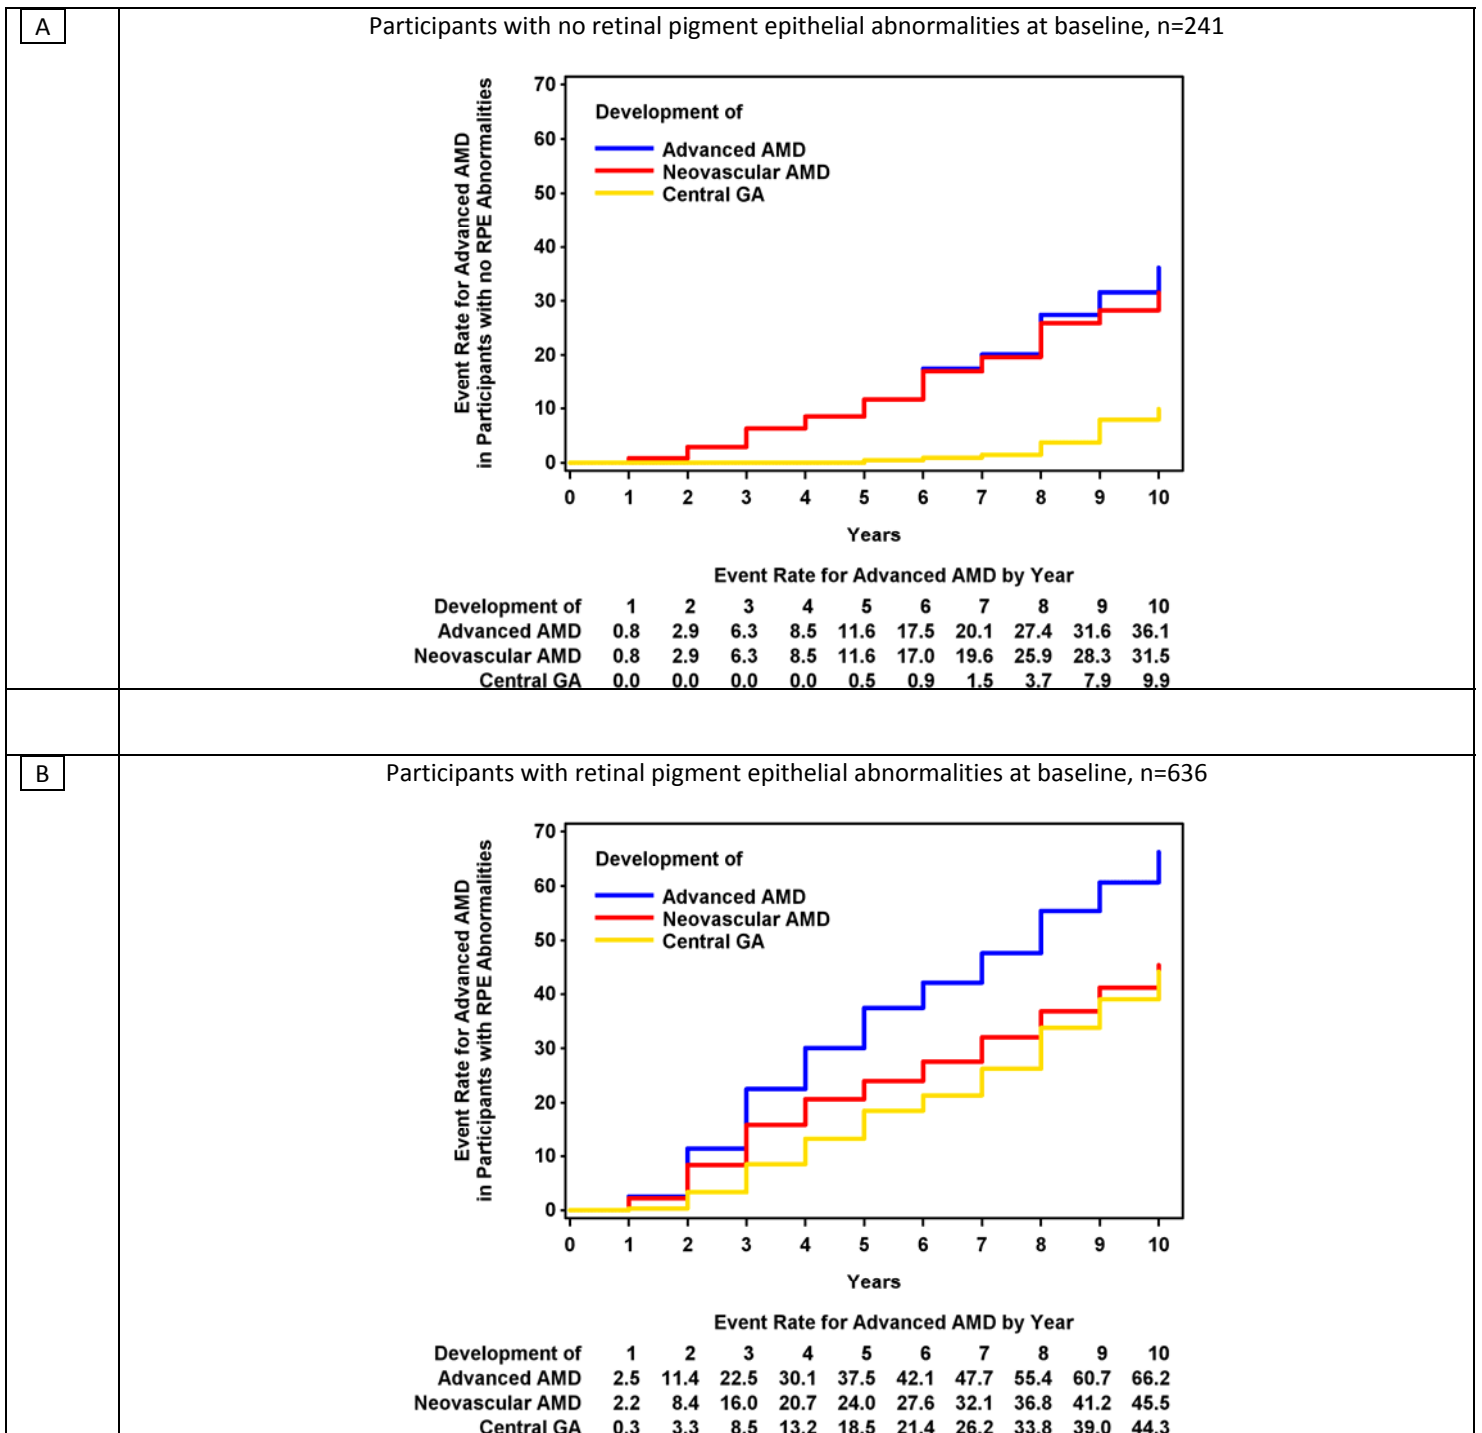

Figure 5. Life-table estimates of advanced AMD in right eyes with large drusen at baseline according to location of large drusen and presence of retinal pigment epithelial abnormalities.

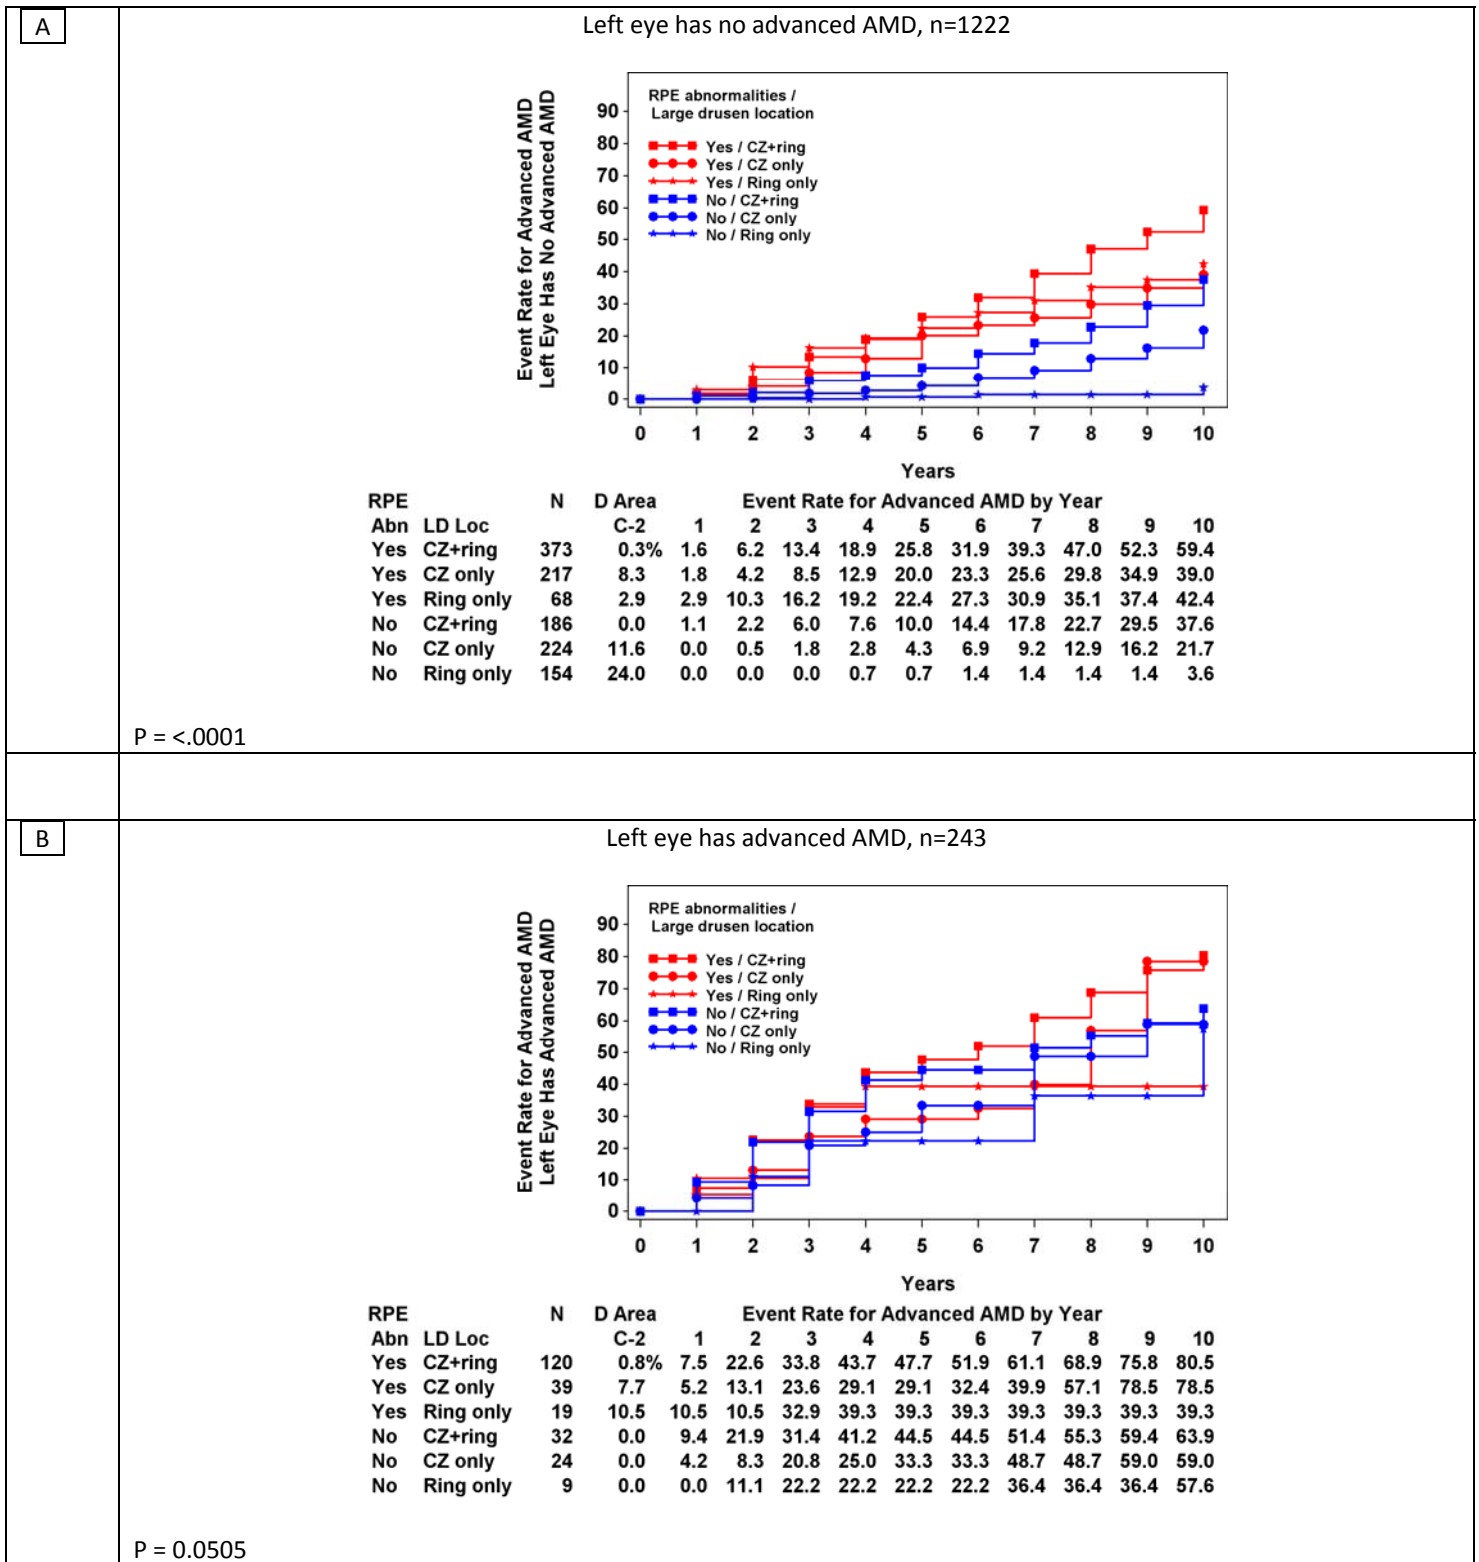

Figure 6. Life-table estimates of advanced AMD in eyes with fellow eyes with and without advanced AMD.

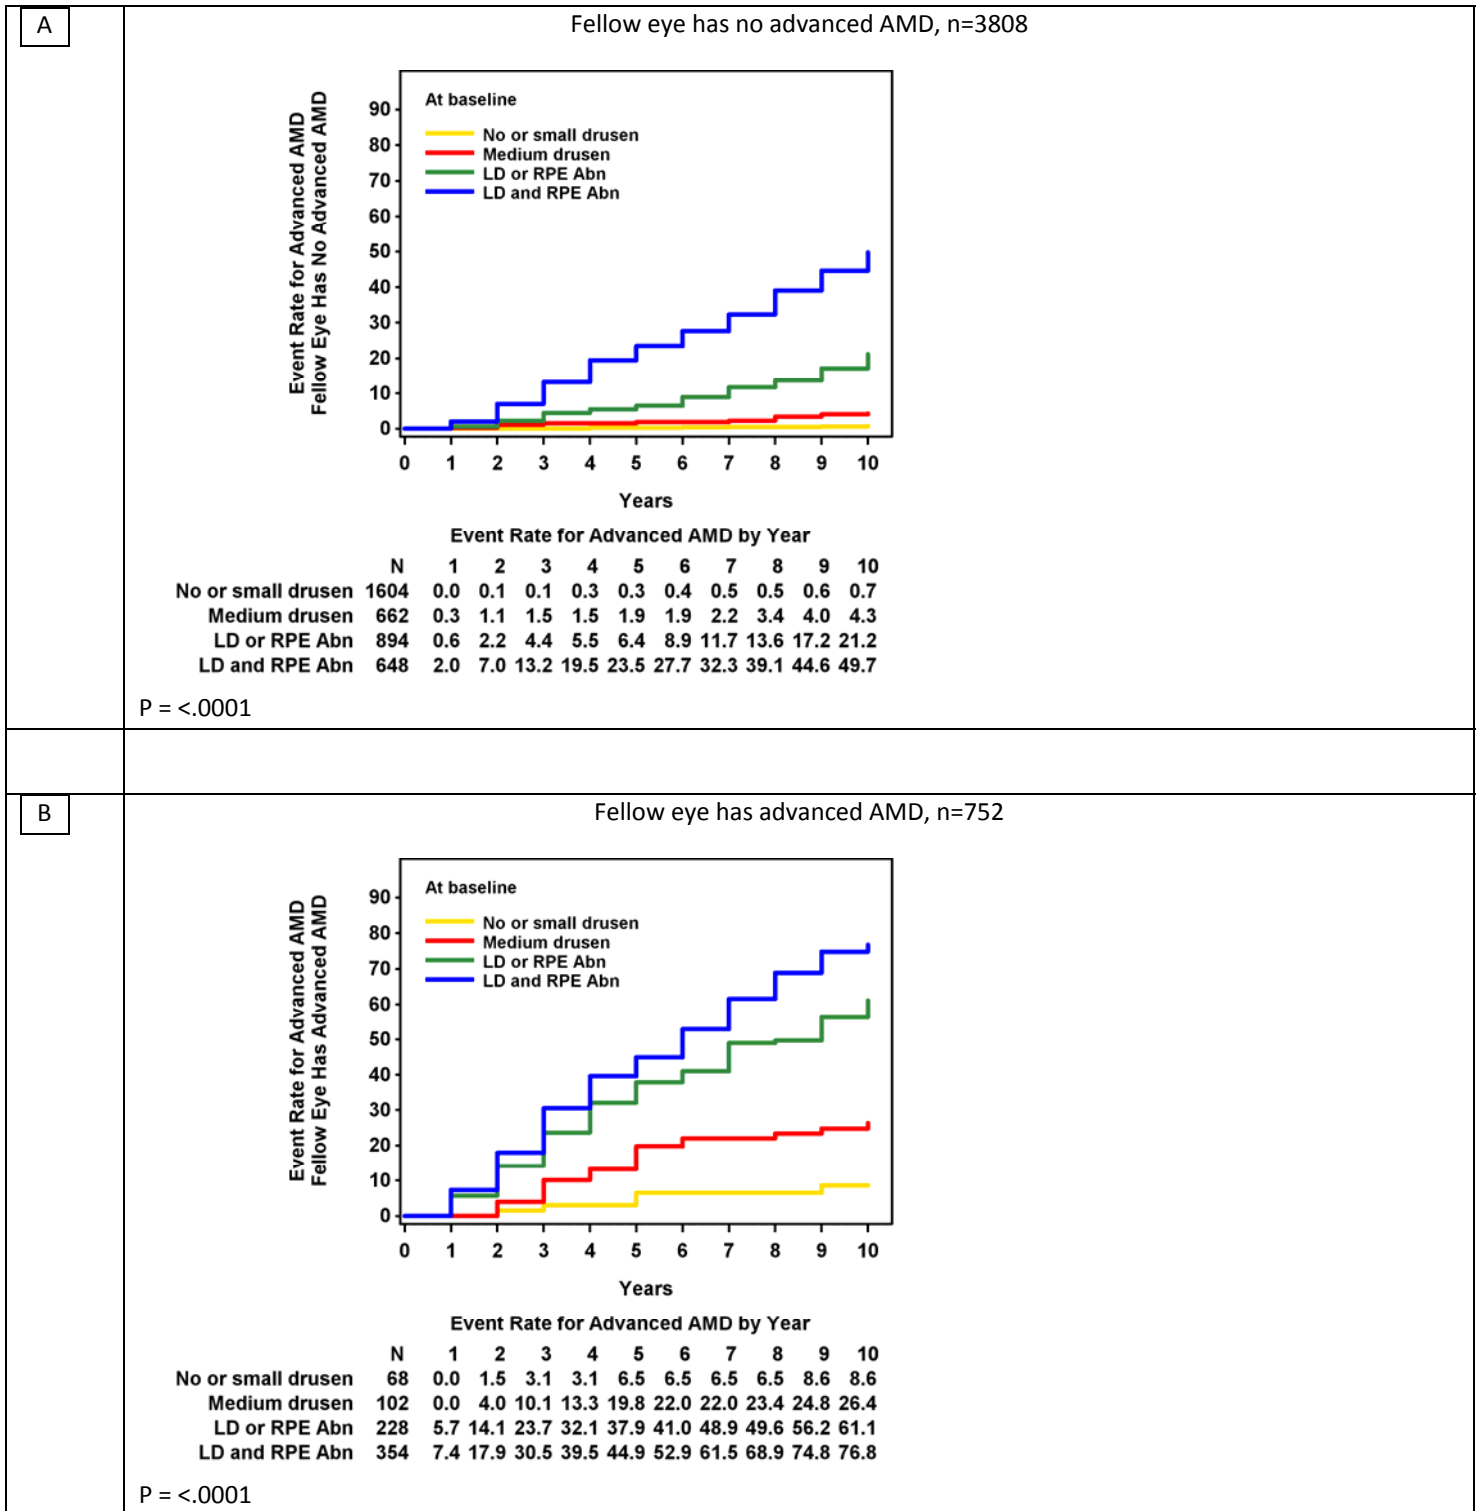

Figure 7. Life-table estimates of neovascular AMD in eyes that developed geographic atrophy, N = 911.

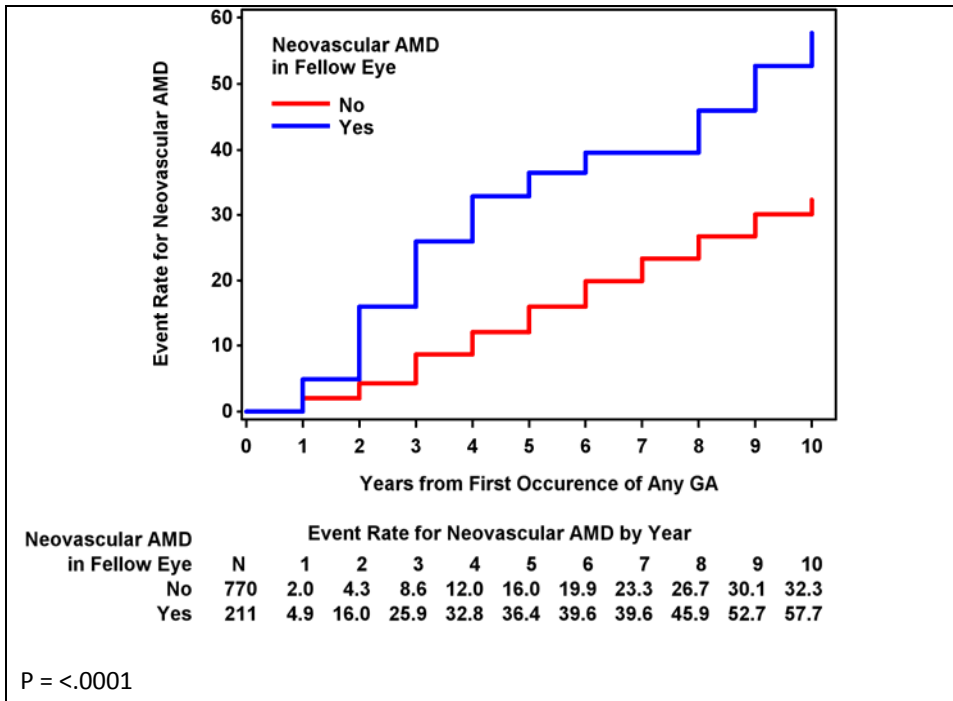



Figure 8. Probability of advanced AMD by AREDS simple scale, N = 3806.

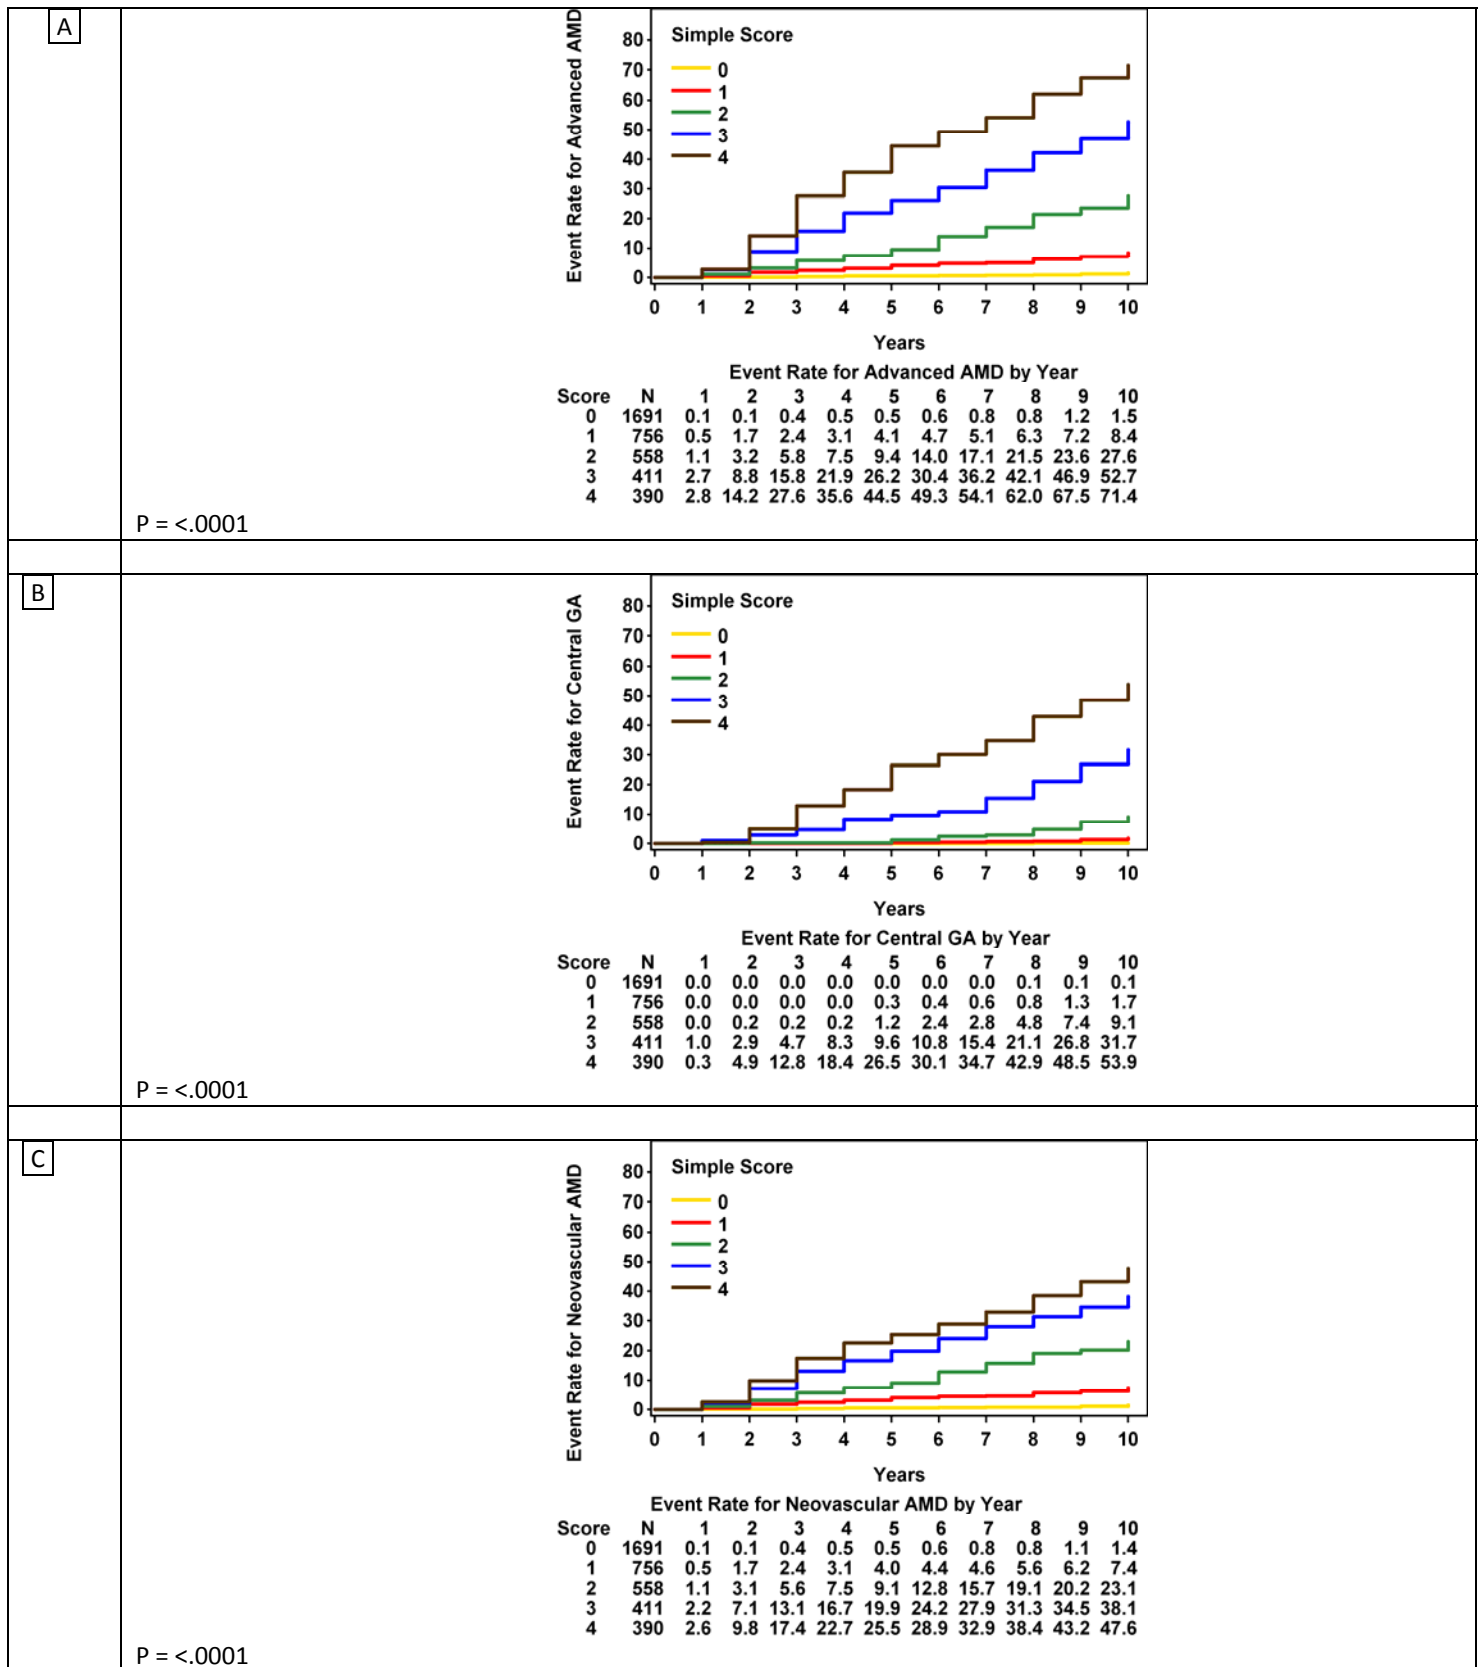

Figure 9. Median visual acuity.

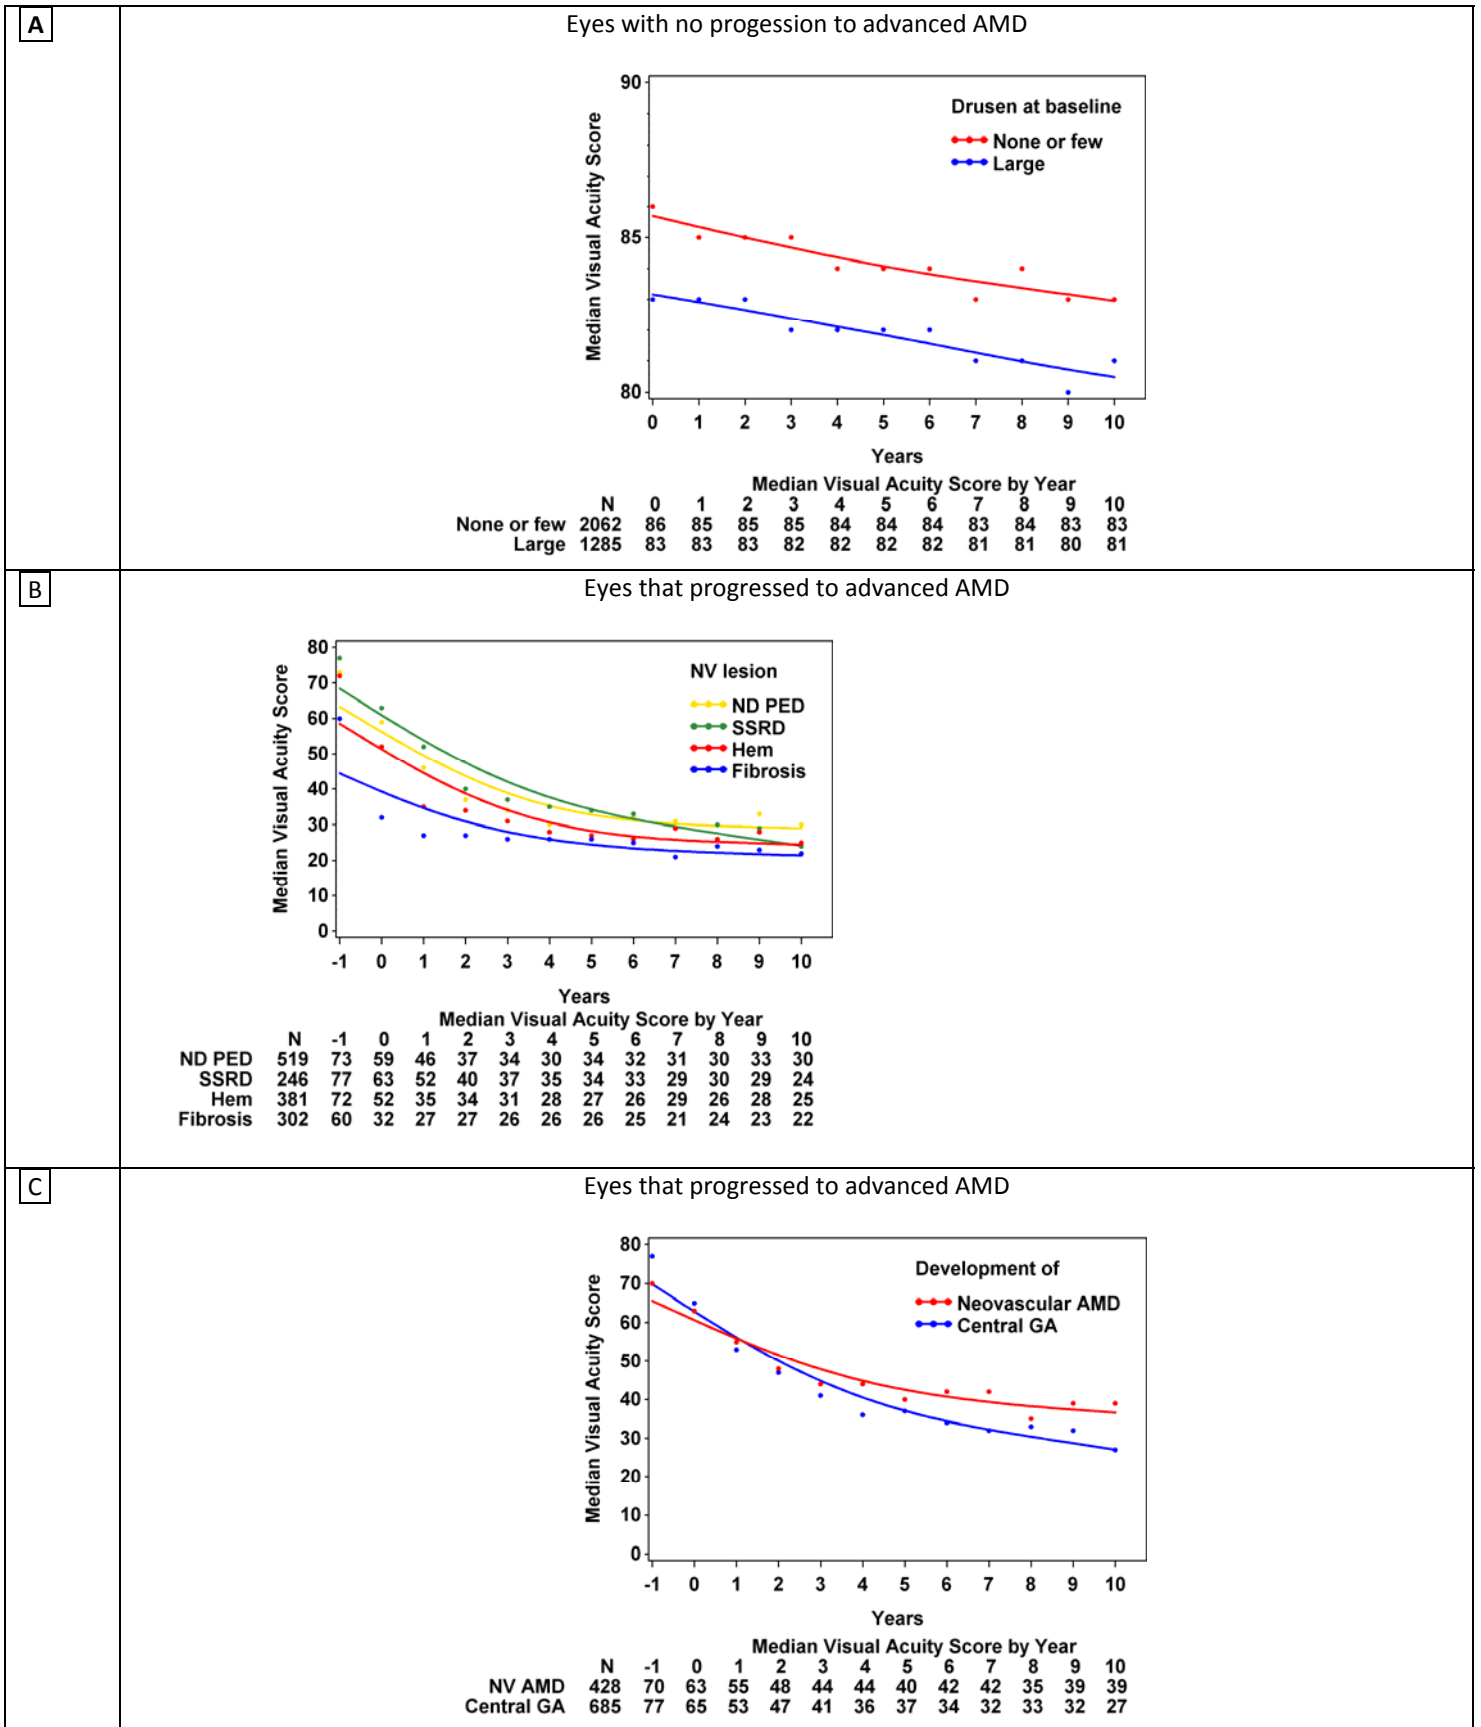

**eTable. Drusen size for eyes with central geographic atrophy (CGA) and neovascular age-related macular degeneration (NV AMD).**

| CGA              |           |             |          |          |         |         |        |        |
|------------------|-----------|-------------|----------|----------|---------|---------|--------|--------|
|                  |           | Drusen size |          |          |         |         |        | P      |
|                  |           | Small       | Medium-1 | Medium-2 | Large-1 | Large-2 | AAMD-1 |        |
| <b>Age</b>       | 55-64     | 0.1         | 0.4      | 1.9      | 2.5     | 7.6     | 19.1   |        |
|                  | 65-69     | 0.1         | 0.5      | 2.1      | 2.7     | 8.4     | 20.7   | 0.590  |
|                  | 70-74     | 0.1         | 0.7      | 3.0      | 3.9     | 11.7    | 28.4   | 0.007  |
|                  | 75-80     | 0.1         | 0.6      | 2.6      | 3.5     | 10.6    | 26.0   | 0.070  |
| <b>Sex</b>       | Female    | 0.1         | 0.5      | 2.3      | 2.9     | 9.1     | 23.0   |        |
|                  | Male      | 0.1         | 0.5      | 2.5      | 3.2     | 10.0    | 25.0   | 0.580  |
| <b>Smoking</b>   | Never     | 0.1         | 0.5      | 2.3      | 3.0     | 10.0    | 24.6   |        |
|                  | Ever      | 0.1         | 0.5      | 2.4      | 3.2     | 9.7     | 25.0   | 0.480  |
|                  | Current   | 0.1         | 0.5      | 2.2      | 2.9     | 9.1     | 22.8   | 0.570  |
| <b>Treatment</b> | Placebo   | 0.1         | 0.5      | 2.4      | 3.1     | 9.8     | 24.7   |        |
|                  | Active    | 0.1         | 0.5      | 2.3      | 3.0     | 9.4     | 23.9   | 0.780  |
| NV AMD           |           |             |          |          |         |         |        |        |
|                  |           | Drusen size |          |          |         |         |        | P      |
|                  |           | Small       | Medium-1 | Medium-2 | Large-1 | Large-2 | AAMD-1 |        |
| <b>Age</b>       | 55-64     | 0.8         | 2.2      | 7.1      | 7.2     | 23.9    | 31.0   |        |
|                  | 65-69     | 1.1         | 2.9      | 9.1      | 9.3     | 29.9    | 38.3   | 0.010  |
|                  | 70-74     | 1.3         | 3.3      | 10.4     | 10.2    | 33.7    | 42.4   | <0.001 |
|                  | 75-80     | 1.5         | 3.9      | 12.8     | 12.7    | 38.9    | 48.1   | <0.001 |
| <b>Sex</b>       | Female    | 1.1         | 3.1      | 10.1     | 10.1    | 33.2    | 42.9   |        |
|                  | Male      | 1.0         | 2.6      | 8.1      | 8.8     | 28.9    | 38.1   | 0.005  |
| <b>Smoking</b>   | Never     | 1.0         | 2.7      | 8.9      | 8.8     | 29.5    | 38.1   |        |
|                  | Ever      | 1.1         | 3.0      | 9.4      | 9.8     | 31.2    | 40.9   | 0.040  |
|                  | Current   | 1.5         | 3.9      | 12.6     | 12.3    | 39.1    | 48.8   | <0.001 |
| <b>Treatment</b> | Placebo   | 1.2         | 3.6      | 11.4     | 11.4    | 36.7    | 47.1   |        |
|                  | Active    | 0.9         | 2.7      | 8.7      | 9.0     | 29.3    | 38.7   | <0.001 |
| <b>Race</b>      | Non-white | 0.3         | 1.0      | 3.3      | 3.4     | 11.2    | 18.8   |        |
|                  | White     | 1.2         | 3.6      | 12.2     | 12.6    | 36.8    | 55.2   | <0.011 |
